# Supplementary material
Source: PubMed Central journal article supplement (PMC4391557)
Supplement: 5e47ded0e5aac066440f07cb5de56358_genetics.114.172221-1.pdf [file 5e47ded0e5aac066440f07cb5de56358_genetics.114.172221-1.pdf]

Figure S1

**A** *Fmr1<sup>3</sup>* mutants depress oviposition in the presence of wasps

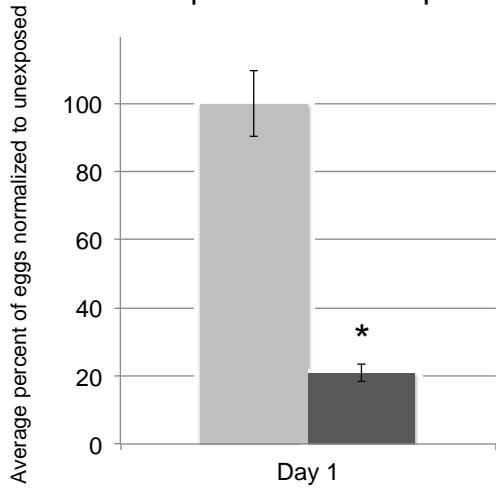

**B** *Fmr1<sup>B55</sup>* mutants depress oviposition in the presence of wasps

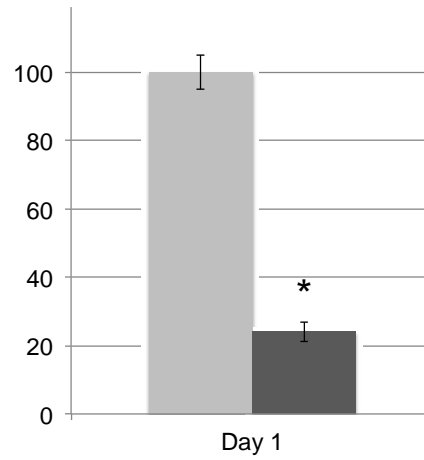

**C** *amn<sup>X8</sup>* mutants depress oviposition in the presence of wasps

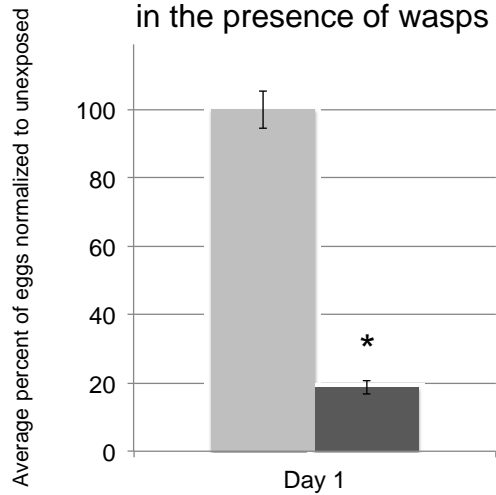

**D** *amn<sup>1</sup>* mutants depress oviposition in the presence of wasps

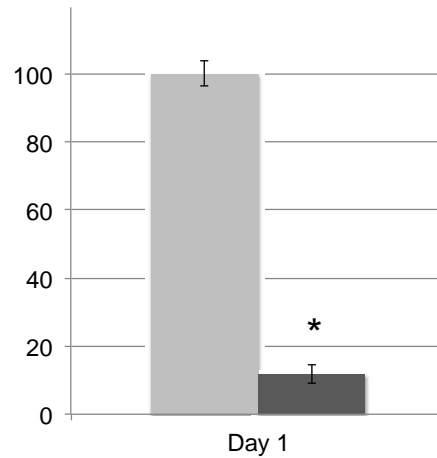

**E** *rut<sup>2080</sup>* mutants depress oviposition in the presence of wasps

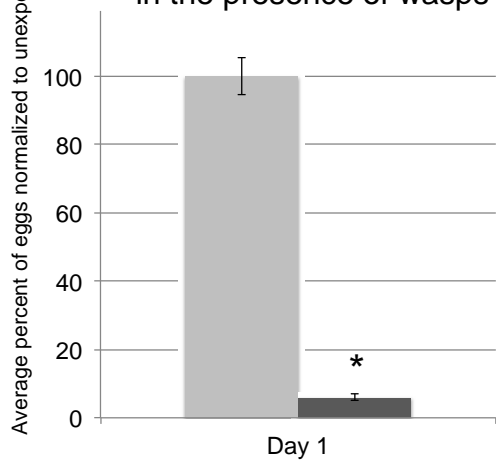

**F** *dnc<sup>ML</sup>* mutants depress oviposition in the presence of wasps

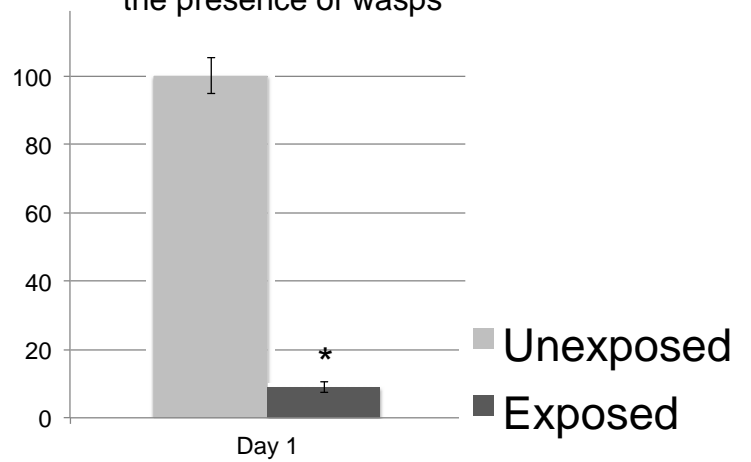

**Figure S1 Flies mutant in memory genes are able to respond to predatory wasps through oviposition depression.** (A-F) Percent of eggs laid normalized to unexposed for (A) *Fmr1*<sup>3</sup>, (B) *Fmr1*<sup>B55</sup>, (C) *amn*<sup>X8</sup>, (D) *amn*<sup>1</sup>, (E) *rut*<sup>2080</sup>, and (F) *dnc*<sup>ML</sup>. All error bars represent standard error ( $n=24$  biological replicates) (\* $P<0.001$ ).

Figure S2

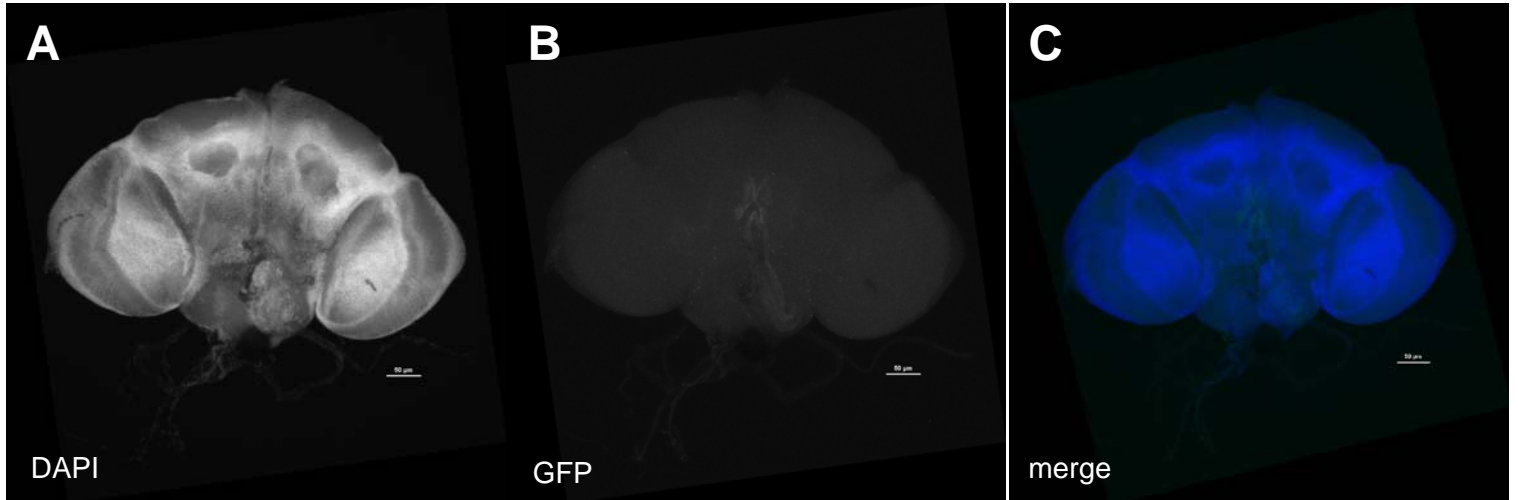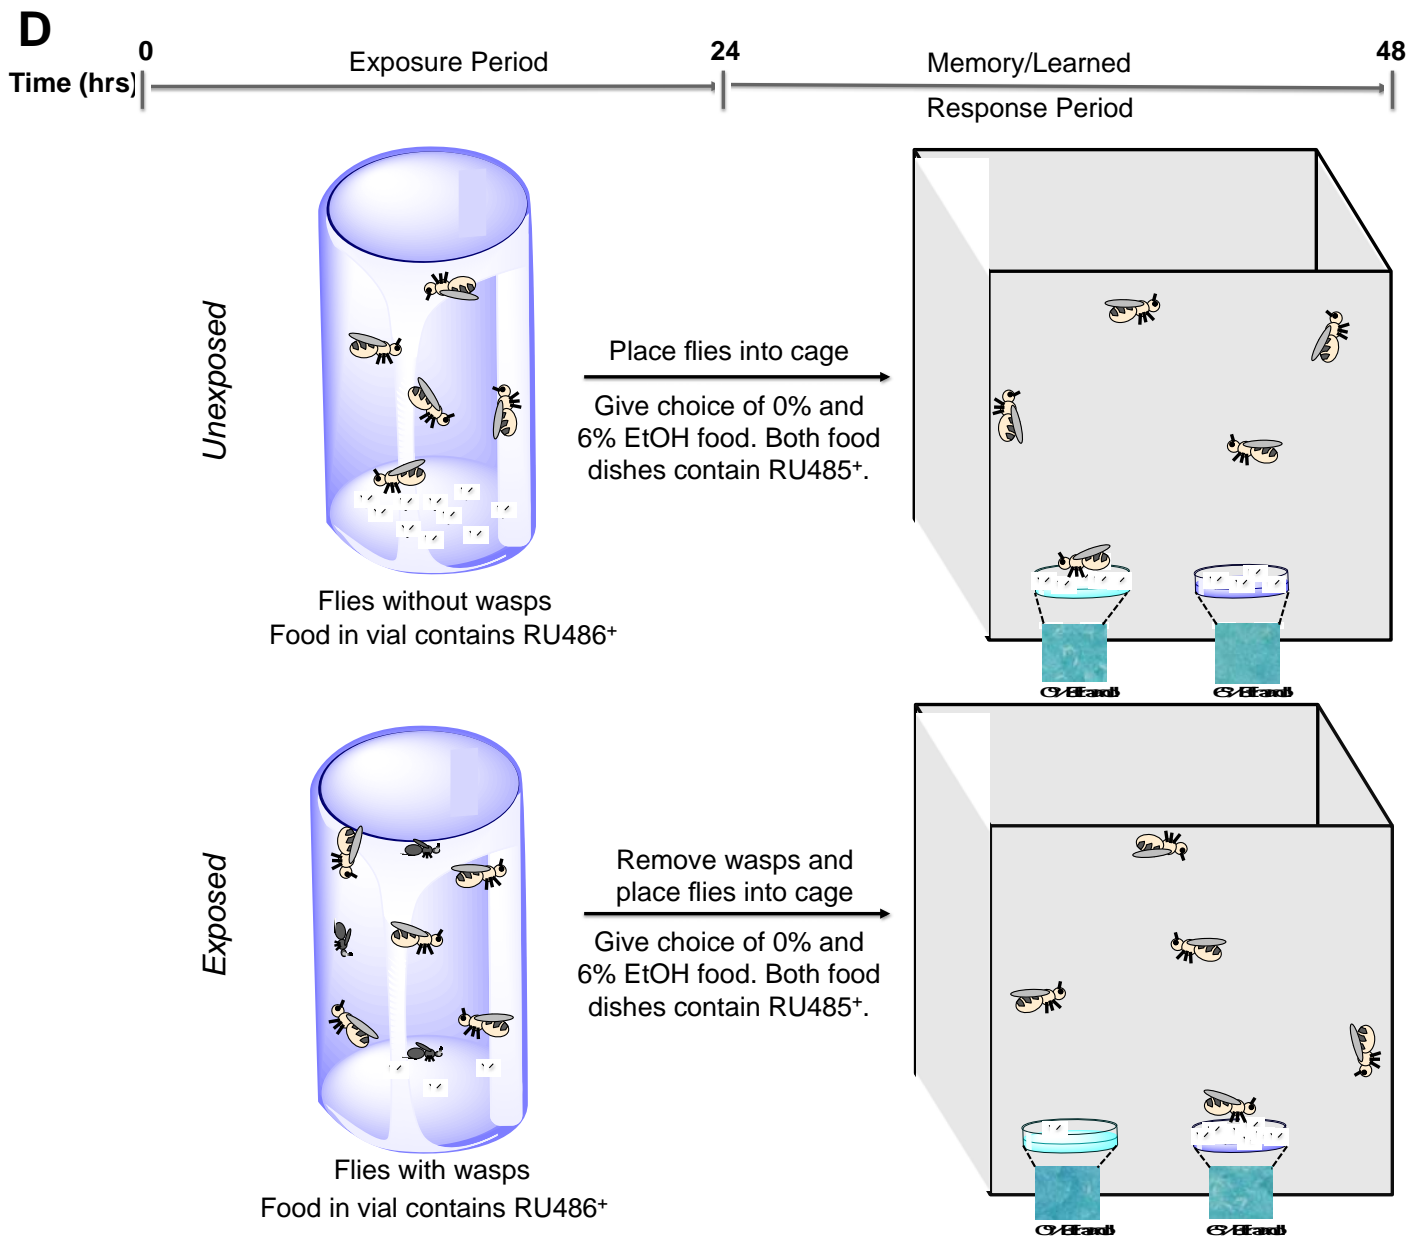

**Figure S2 Experimental design for MB Gene-Switch Experiments and control brains.** Brains from flies carrying transgenes for the Gene-Switch construct in the mushroom body along with a GFP nls showing (A) DAPI, (B) GFP expression, and (C) the merged image. Note that images in (A-C) illustrate a control brain in which RU486 was not included in the food. See Figure 5 (A-C) for comparison of GFP-labeled mushroom body after RU486 feeding. (D) Diagram of the standard oviposition preference memory setup when using RU486 feeding.

Figure S3

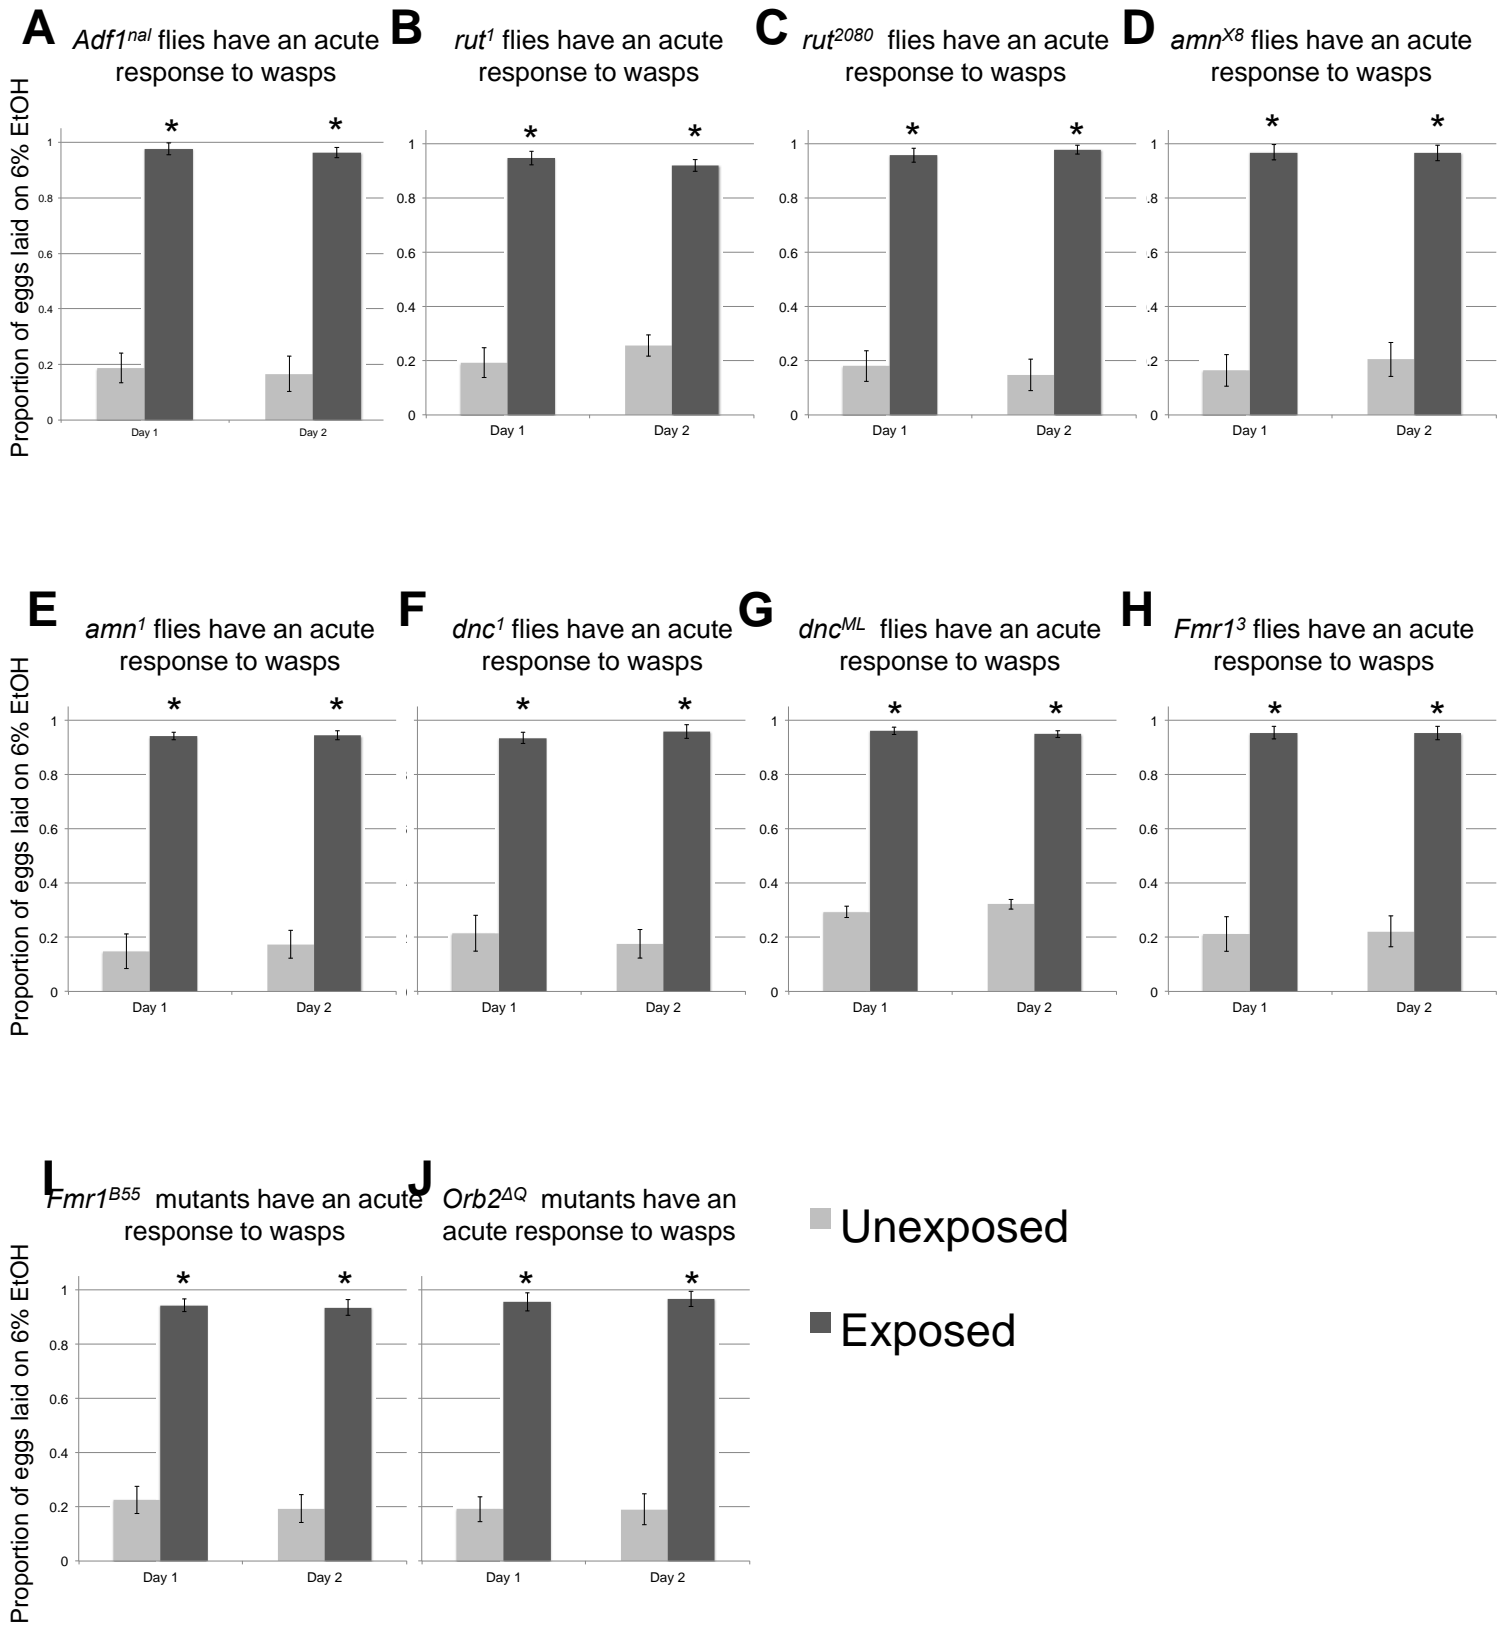

**Figure S3 Further evidence demonstrating the role of LTM in the fly-wasp memory paradigm.** Proportion of eggs laid on the 6% ethanol oviposition dish during constant wasp exposure for (A) *Adf1<sup>nal</sup>*, (B) *rut<sup>1</sup>*, (C) *rut<sup>2080</sup>*, (D) *amn<sup>X8</sup>*, (E) *amn<sup>X1</sup>*, (F) *dnc<sup>1</sup>*, (G) *dnc<sup>ML</sup>*, (H) *Fmr1<sup>3</sup>*, (I) *Fmr1<sup>B55</sup>*, and (J) *Orb2<sup>ΔQ</sup>*. Error bars represent 95% confidence intervals. (*n*= 10 biological replicates) (\* *P* < 0.001). Diagram of the oviposition preference setup using five flies with constant exposure to wasps in Figure 6B.

Figure S4

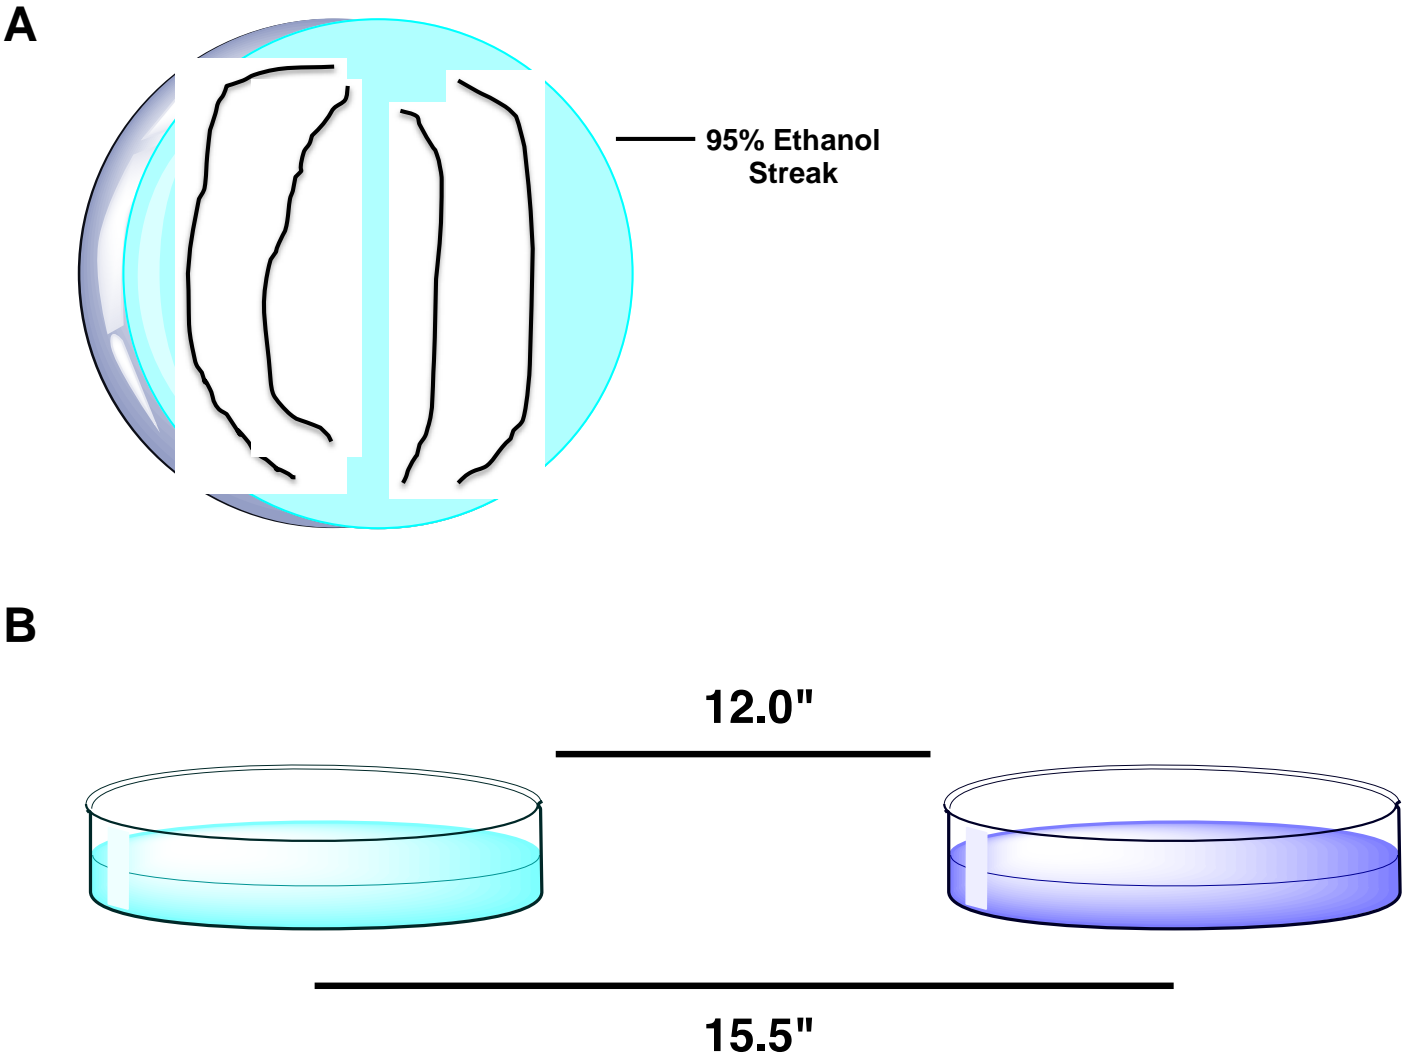

**Figure S4** Field cage preparation and measurements. (A) Sample Petri dish demonstrating how to streak 95% ethanol over instant food already hydrated with ddH<sub>2</sub>O. (B) Two Petri dishes positioned as if they are in the field cage, showing distance between plates.

Figure S5

**A**

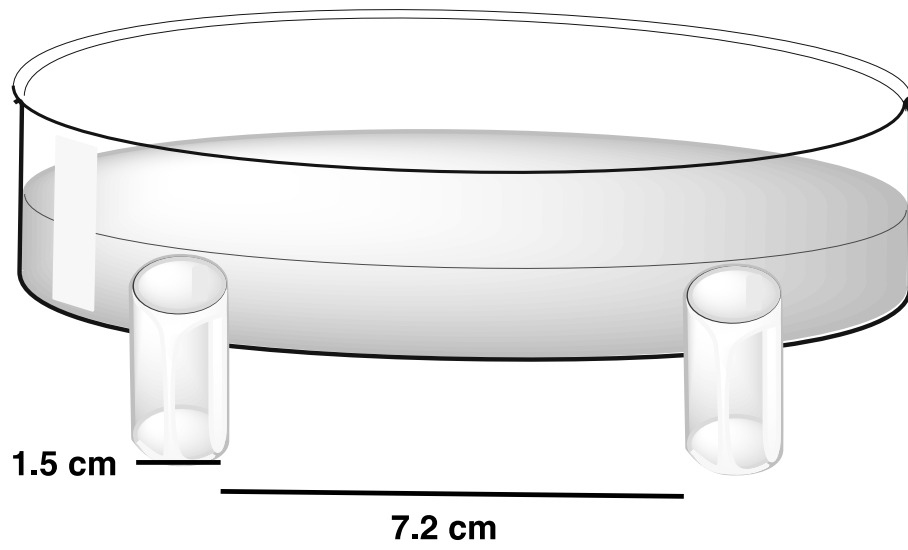

**B**

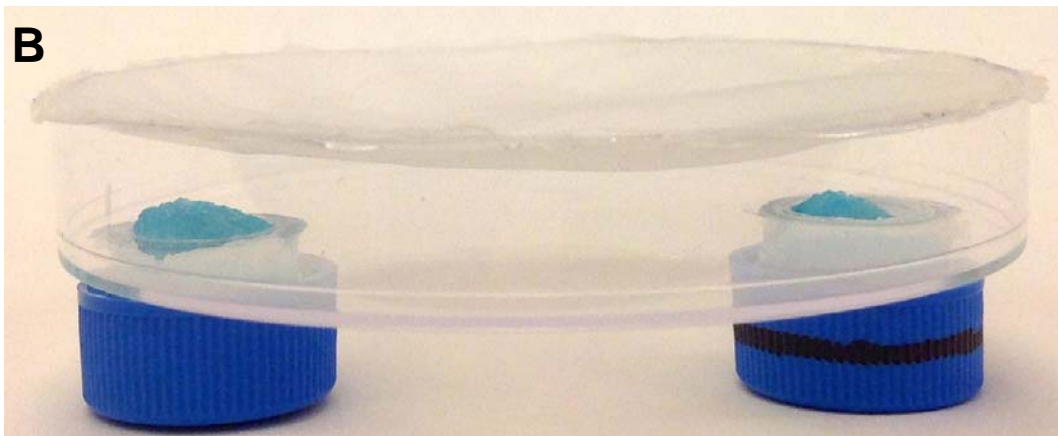

**C**

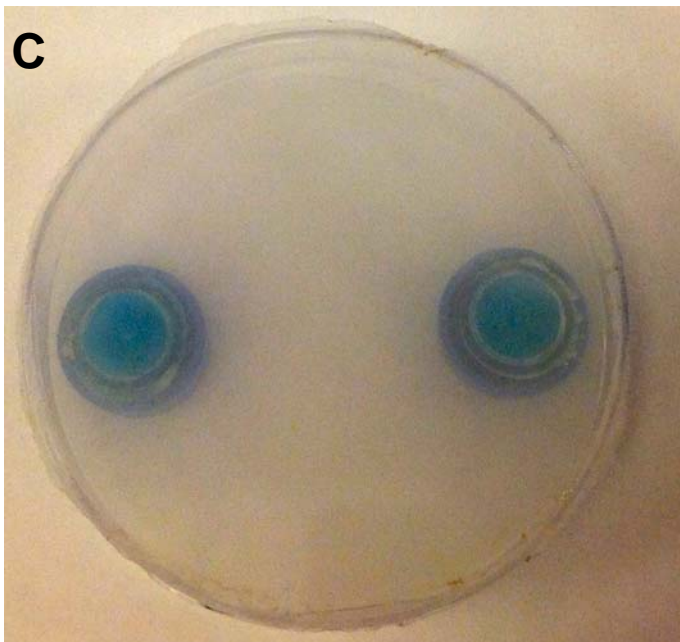



**Figure S5 Fly Corral preparation and measurements.** (A) Sample Fly Corral cage showing distances between caps and diameter of caps. (B) Lateral view of Fly Corral. (C) Dorsal view of Fly Corral.

**Table S1 Statistical analyses for main figures.** Welch's two-tailed t-tests were performed for all egg count data. P-values reported were calculated for comparisons between paired treatment-group and unexposed.

| <u>Corresponding figure</u> | <u>Comparison groups</u>                                              | <u>Sample size</u> | <u>p-value</u> | <u>Statistical test</u> |
|-----------------------------|-----------------------------------------------------------------------|--------------------|----------------|-------------------------|
| 1B                          | CS (0-24) exposed vs unexposed                                        | 4                  | 1.34E-05       | t-test                  |
| 1B                          | CS (24-48) exposed vs unexposed                                       | 4                  | 1.15E-03       | t-test                  |
| 1B                          | OreR (0-24) exposed vs unexposed                                      | 4                  | 6.19E-04       | t-test                  |
| 1B                          | OreR (24-48) exposed vs unexposed                                     | 4                  | 3.21E-06       | t-test                  |
| 1B                          | w1118 (0-24) exposed vs unexposed                                     | 4                  | 1.93E-04       | t-test                  |
| 1B                          | w1118 (24-48) exposed vs unexposed                                    | 4                  | 2.42E-04       | t-test                  |
| 1C                          | CS (0-24) 2.5 hr exposed vs unexposed                                 | 4                  | 5.10E-01       | t-test                  |
| 1C                          | CS (24-48) 2.5 hr exposed vs unexposed                                | 4                  | 1.70E-01       | t-test                  |
| 1C                          | CS (0-24) 7 hr exposed vs unexposed                                   | 4                  | 6.65E-02       | t-test                  |
| 1C                          | CS (24-48) 7 hr exposed vs unexposed                                  | 4                  | 3.76E-01       | t-test                  |
| 1C                          | CS (0-24) 14 hr exposed vs unexposed                                  | 4                  | 5.35E-05       | t-test                  |
| 1C                          | CS (24-48) 14 hr exposed vs unexposed                                 | 4                  | 9.98E-04       | t-test                  |
| 1C                          | CS (0-24) 24 hr exposed vs unexposed                                  | 4                  | 1.34E-05       | t-test                  |
| 1C                          | CS (24-48) 24 hr exposed vs unexposed                                 | 4                  | 1.15E-03       | t-test                  |
| 2A                          | Adf1[ <i>nal</i> ] (0-24) exposed vs unexposed                        | 4                  | 5.65E-01       | t-test                  |
| 2A                          | Adf1 [ <i>nal</i> ] (24-48) exposed vs unexposed                      | 4                  | 9.93E-01       | t-test                  |
| 2B                          | rut[1] (0-24) exposed vs unexposed                                    | 4                  | 6.51E-01       | t-test                  |
| 2B                          | rut [1] (24-48) exposed vs unexposed                                  | 4                  | 5.30E-01       | t-test                  |
| 2C                          | rut[2080] (0-24) exposed vs unexposed                                 | 4                  | 7.95E-01       | t-test                  |
| 2C                          | rut[2080] (24-48) exposed vs unexposed                                | 4                  | 2.53E-01       | t-test                  |
| 2D                          | amn[X8] (0-24) exposed vs unexposed                                   | 4                  | 2.30E-01       | t-test                  |
| 2D                          | amn [X8] (24-48) exposed vs unexposed                                 | 4                  | 1.01E-01       | t-test                  |
| 2E                          | amn[1] (0-24) exposed vs unexposed                                    | 4                  | 2.24E-01       | t-test                  |
| 2E                          | amn[1] (24-48) exposed vs unexposed                                   | 4                  | 7.51E-01       | t-test                  |
| 2F                          | dnc[1] (0-24) exposed vs unexposed                                    | 4                  | 4.83E-01       | t-test                  |
| 2F                          | dnc[1] (24-48) exposed vs unexposed                                   | 4                  | 9.90E-01       | t-test                  |
| 2G                          | dnc[ML] (0-24) exposed vs unexposed                                   | 4                  | 3.93E-01       | t-test                  |
| 2G                          | dnc[ML] (24-48) exposed vs unexposed                                  | 4                  | 1.10E-01       | t-test                  |
| 2H                          | FMR1[3] (0-24) exposed vs unexposed                                   | 4                  | 3.22E-01       | t-test                  |
| 2H                          | FMR1[3] (24-48) exposed vs unexposed                                  | 4                  | 2.36E-01       | t-test                  |
| 2I                          | FMR1[B55] (0-24) exposed vs unexposed                                 | 4                  | 5.25E-01       | t-test                  |
| 2I                          | FMR1[B55] (24-48) exposed vs unexposed                                | 4                  | 3.24E-01       | t-test                  |
| 2J                          | Orb2[ΔQ] (0-24) exposed vs unexposed                                  | 4                  | 4.00E-01       | t-test                  |
| 2J                          | Orb2[ΔQ] (24-48) exposed vs unexposed                                 | 4                  | 6.14E-01       | t-test                  |
| 2K                          | Orb2[ΔQ] (0-24) constant exposure vs unexposed                        | 4                  | 6.84E-05       | t-test                  |
| 2K                          | Orb2[ΔQ] (24-48) constant exposure vs unexposed                       | 4                  | 3.91E-04       | t-test                  |
| 3A                          | TeTx (0-24) exposed vs unexposed                                      | 4                  | 7.18E-01       | t-test                  |
| 3A                          | TeTx (24-48) exposed vs unexposed                                     | 4                  | 6.78E-02       | t-test                  |
| 3B                          | TeTx (0-24) constant exposure vs unexposed                            | 4                  | 5.54E-03       | t-test                  |
| 3B                          | TeTx (24-48) constant exposure vs unexposed                           | 4                  | 6.75E-07       | t-test                  |
| 3C                          | OK107 GAL4 (0-24) exposed vs unexposed                                | 4                  | 6.67E-04       | t-test                  |
| 3C                          | OK107 GAL4 (24-48) exposed vs unexposed                               | 4                  | 8.10E-04       | t-test                  |
| 3D                          | UAS TeTx (0-24) exposed vs unexposed                                  | 4                  | 1.71E-04       | t-test                  |
| 3D                          | UAS TeTx (24-48) exposed vs unexposed                                 | 4                  | 1.99E-06       | t-test                  |
| 4A                          | Orb2 [RNAi] (0-24) exposed vs unexposed                               | 4                  | 3.48E-01       | t-test                  |
| 4A                          | Orb2 [RNAi] (24-48) exposed vs unexposed                              | 4                  | 7.25E-01       | t-test                  |
| 4C                          | Orb2 [RNAi] (0-24) constant exposure vs unexposed                     | 4                  | 9.21E-04       | t-test                  |
| 4C                          | Orb2 [RNAi] (24-48) constant exposure vs unexposed                    | 4                  | 1.96E-04       | t-test                  |
| 4D                          | UAS Orb2 [RNAi] (0-24) exposed vs unexposed                           | 4                  | 1.52E-04       | t-test                  |
| 4D                          | UAS Orb2 [RNAi] (24-48) exposed vs unexposed                          | 4                  | 6.06E-05       | t-test                  |
| 5E                          | MB switch ; Orb2 [RNAi] RU486+ (0-24) exposed vs unexposed            | 4                  | 4.59E-01       | t-test                  |
| 5E                          | MB switch ; Orb2 [RNAi] RU486+ (24-48) exposed vs unexposed           | 4                  | 7.22E-01       | t-test                  |
| 5F                          | MB switch ; Orb2 [RNAi] RU486- (0-24) exposed vs unexposed            | 4                  | 3.14E-03       | t-test                  |
| 5F                          | MB switch ; Orb2 [RNAi] RU486 (24-48) exposed vs unexposed            | 4                  | 6.33E-03       | t-test                  |
| 5G                          | MB switch ; Orb2 [RNAi] RU486+ (0-24) constant exposure vs unexposed  | 4                  | 4.73E-07       | t-test                  |
| 5G                          | MB switch ; Orb2 [RNAi] RU486+ (24-48) constant exposure vs unexposed | 4                  | 1.34E-04       | t-test                  |
| 5H                          | MB switch RU486+ (0-24) exposed vs unexposed                          | 4                  | 5.57E-06       | t-test                  |
| 5H                          | MB switch RU486+ (24-48) exposed vs unexposed                         | 4                  | 3.63E-04       | t-test                  |
| 5I                          | MB switch RU486- (0-24) exposed vs unexposed                          | 4                  | 9.91E-04       | t-test                  |
| 5I                          | MB switch RU486- (24-48) exposed vs unexposed                         | 4                  | 1.27E-03       | t-test                  |
| 6C                          | Single CS (0-24) exposed vs unexposed                                 | 10                 | 6.31E-08       | t-test                  |
| 6C                          | Single CS (24-48) exposed vs unexposed                                | 10                 | 5.83E-07       | t-test                  |
| 6D                          | Five CS (0-24) exposed vs unexposed                                   | 10                 | 7.85E-07       | t-test                  |
| 6D                          | Five CS (24-48) exposed vs unexposed                                  | 10                 | 1.67E-06       | t-test                  |
| 6E                          | Canton-S (0-24) constant exposure vs unexposed                        | 10                 | 7.04E-13       | t-test                  |
| 6E                          | Canton-S (24-48) constant exposure vs unexposed                       | 10                 | 1.80E-13       | t-test                  |

Table S 2

| <u>Corresponding figure</u> | <u>Comparison groups</u>                         | <u>Sample size</u> | <u>p-value</u> | <u>Statistical test</u> |
|-----------------------------|--------------------------------------------------|--------------------|----------------|-------------------------|
| S1A                         | Fmr1[3] (0-24) exposed vs unexposed              | 24                 | 1.93E-08       | t-test                  |
| S1B                         | Fmr1[B55] (0-24) exposed vs unexposed            | 24                 | 1.31E-15       | t-test                  |
| S1C                         | amn[X8] (0-24) exposed vs unexposed              | 24                 | 3.87E-14       | t-test                  |
| S1D                         | amn[1] (0-24) exposed vs unexposed               | 24                 | 1.78E-22       | t-test                  |
| S1E                         | rut[2080] (0-24) exposed vs unexposed            | 24                 | 4.61E-15       | t-test                  |
| S1F                         | dnc[mL] (0-24) exposed vs unexposed              | 24                 | 4.12E-16       | t-test                  |
| S3A                         | Adf1[naI] (0-24) constant exposure vs unexposed  | 10                 | 8.10E-12       | t-test                  |
| S3A                         | Adf1[naI] (24-48) constant exposure vs unexposed | 10                 | 2.23E-10       | t-test                  |
| S3B                         | rut[1] (0-24) constant exposure vs unexposed     | 10                 | 7.50E-12       | t-test                  |
| S3B                         | rut[1] (24-48) constant exposure vs unexposed    | 10                 | 6.79E-14       | t-test                  |
| S3C                         | rut[2080] (0-24) constant exposure vs unexposed  | 10                 | 4.68E-12       | t-test                  |
| S3C                         | rut[2080] (24-48) constant exposure vs unexposed | 10                 | 5.04E-11       | t-test                  |
| S3D                         | amn[X8] (0-24) constant exposure vs unexposed    | 10                 | 3.00E-12       | t-test                  |
| S3D                         | amn[X8] (24-48) constant exposure vs unexposed   | 10                 | 3.71E-11       | t-test                  |
| S3E                         | amn[1] (0-24) constant exposure vs unexposed     | 10                 | 4.74E-10       | t-test                  |
| S3E                         | amn[1] (24-48) constant exposure vs unexposed    | 10                 | 1.94E-11       | t-test                  |
| S3F                         | dnc[1] (0-24) constant exposure vs unexposed     | 10                 | 8.51E-10       | t-test                  |
| S3F                         | dnc[1] (24-48) constant exposure vs unexposed    | 10                 | 9.05E-13       | t-test                  |
| S3G                         | dnc[ML] (0-24) constant exposure vs unexposed    | 10                 | 4.26E-19       | t-test                  |
| S3G                         | dnc[ML] (24-48) constant exposure vs unexposed   | 10                 | 6.00E-20       | t-test                  |
| S3H                         | FMR1[3] (0-24) constant exposure vs unexposed    | 10                 | 1.71E-10       | t-test                  |
| S3H                         | FMR1[3] (24-48) constant exposure vs unexposed   | 10                 | 2.21E-11       | t-test                  |
| S3I                         | FMR1[B55] (0-24) constant exposure vs unexposed  | 10                 | 2.33E-12       | t-test                  |
| S3I                         | FMR1[B55] (24-48) constant exposure vs unexposed | 10                 | 8.49E-13       | t-test                  |
| S3J                         | Orb2[ΔQ] (0-24) constant exposure vs unexposed   | 10                 | 9.94E-15       | t-test                  |
| S3J                         | Orb2[ΔQ] (24-48) constant exposure vs unexposed  | 10                 | 4.53E-12       | t-test                  |

**Table S3 Fly genotypes used in this study.**

| Gene/Allele Name                | Genotype                                                                            | Acquisition Location        | ID #   |
|---------------------------------|-------------------------------------------------------------------------------------|-----------------------------|--------|
| <i>dnc</i> <sup>1</sup>         | <i>dnc</i> [1]                                                                      | Griffith Lab                | 6020   |
| <i>rut</i> <sup>1</sup>         | <i>rut</i> [1]                                                                      | Griffith Lab                | 9404   |
| <i>Orb2</i> <sup>ΔQ</sup>       | <i>Orb2</i> <sup>ΔQ</sup>                                                           | <i>Keleman et al., 2007</i> | N/A    |
| <i>Adf1</i> <sup>nal</sup>      | <i>Adf1</i> <sup>nal</sup>                                                          | <i>DeZazzo et al., 2000</i> | N/A    |
| <i>UAS-TeTx</i>                 | <i>wg</i> <sup>1</sup> <i>w</i> [*]; P{w[+mC]=UAS-TeTxLC.tnt}G2                     | Bloomington Stock Center    | 28838  |
| <i>OK-107</i>                   | <i>w</i> [*];<br>P{w[+mW.hs]=GawB}ey[OK107]/In(4)ci[D], ci[D] pan[ciD], sv[spa-pol] | Bloomington Stock Center    | 854    |
| <i>amn</i> <sup>1</sup>         | <i>amn</i> [1]                                                                      | Griffith Lab                | 5954   |
| <i>dnc</i> <sup>ML</sup>        | <i>y</i> [1] <i>w</i> [1] <i>dnc</i> [ML] <i>f</i> [36a]/FM7a                       | Griffith Lab                | 9407   |
| <i>rut</i> <sup>2080</sup>      | P{ry[+t7.2]=lArB}rut[2080]; P{w[+mC]=UAS-rut.Z}2                                    | Griffith Lab                | 9405   |
| <i>amn</i> <sup>X8</sup>        | <i>amn</i> [X8]                                                                     | Griffith Lab                | N/A    |
| <i>FMR1</i> <sup>3</sup>        | <i>Fmr1</i> [3]                                                                     | -                           | N/A    |
| <i>FMR1</i> <sup>B55</sup>      | <i>w</i> [*]; <i>Fmr1</i> [B55]                                                     | Bloomington Stock Center    | 109026 |
| <i>UAS-Orb2</i> <sup>RNAi</sup> | <i>y</i> [1] <i>v</i> [1]; P{y[+t7.7]v[+t1.8]=TRiP.JF02376}attP2                    | Bloomington Stock Center    | 27050  |
| <i>MB Gene-Switch</i>           | P{MB-Switch}                                                                        | Greg Roman                  | N/A    |
