# Supplementary material
Source: PubMed Central journal article supplement (PMC4391557)
Supplement: 7ace7e66831af1aed48ae5a7d3672376_genetics.114.172221-8.pdf [file 7ace7e66831af1aed48ae5a7d3672376_genetics.114.172221-8.pdf]

Figure S1

**A** *Fmr1<sup>3</sup>* mutants depress oviposition in the presence of wasps

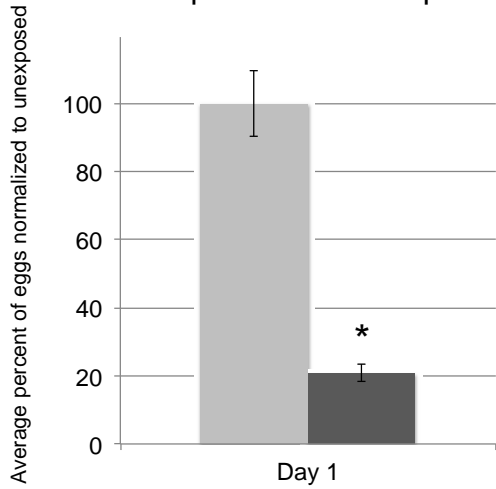

**B** *Fmr1<sup>B55</sup>* mutants depress oviposition in the presence of wasps

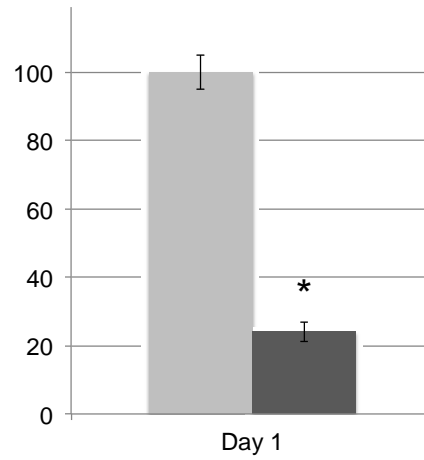

**C** *amn<sup>X8</sup>* mutants depress oviposition in the presence of wasps

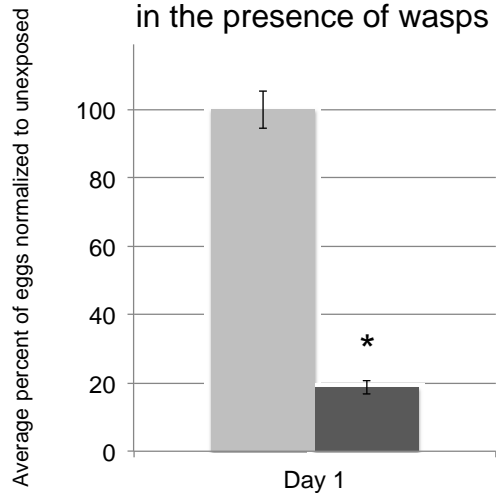

**D** *amn<sup>1</sup>* mutants depress oviposition in the presence of wasps

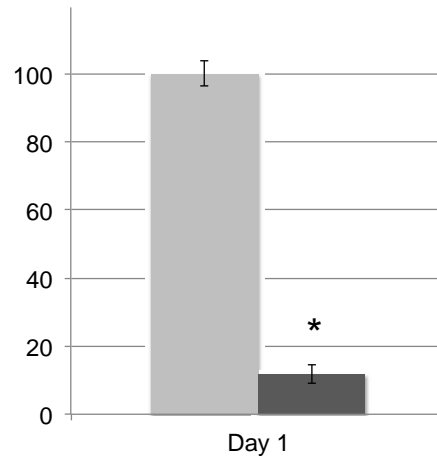

**E** *rut<sup>2080</sup>* mutants depress oviposition in the presence of wasps

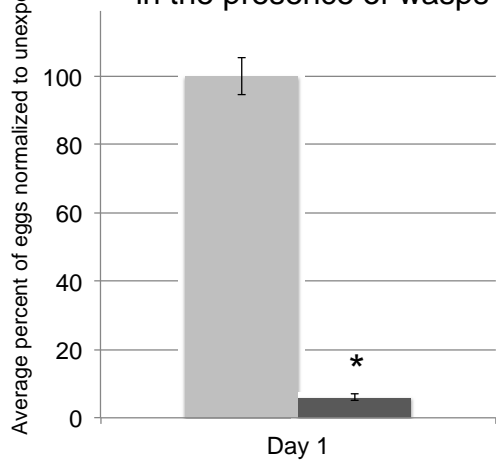

**F** *dnc<sup>ML</sup>* mutants depress oviposition in the presence of wasps

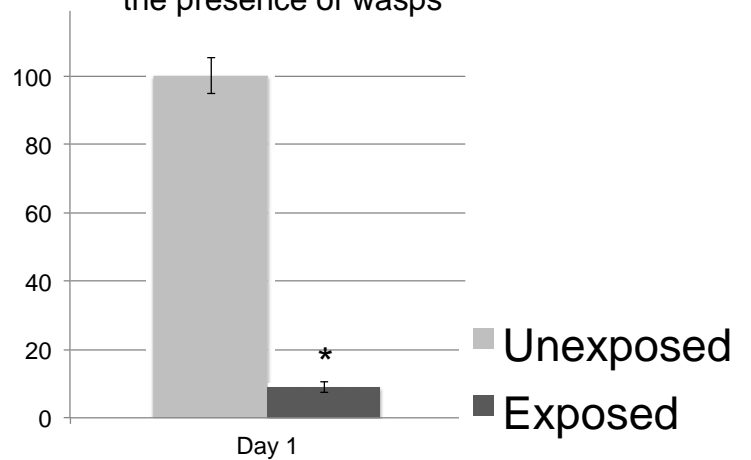

**Figure S1 Flies mutant in memory genes are able to respond to predatory wasps through oviposition depression.** (A-F) Percent of eggs laid normalized to unexposed for (A) *Fmr1*<sup>3</sup>, (B) *Fmr1*<sup>B55</sup>, (C) *amn*<sup>X8</sup>, (D) *amn*<sup>1</sup>, (E) *rut*<sup>2080</sup>, and (F) *dnc*<sup>ML</sup>. All error bars represent standard error ( $n=24$  biological replicates) (\* $P<0.001$ ).
