# Supplementary material
Source: PubMed Central journal article supplement (PMC4391557)
Supplement: 957d13fe9126220565b43724f29bd21d_genetics.114.172221-5.pdf [file 957d13fe9126220565b43724f29bd21d_genetics.114.172221-5.pdf]

Figure S2

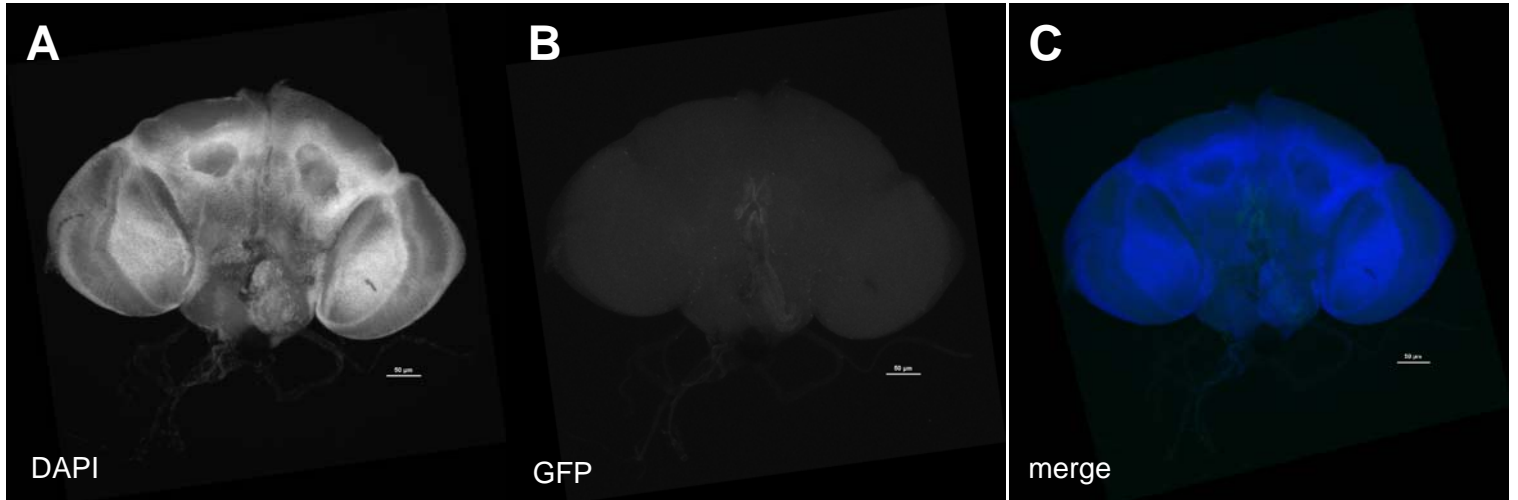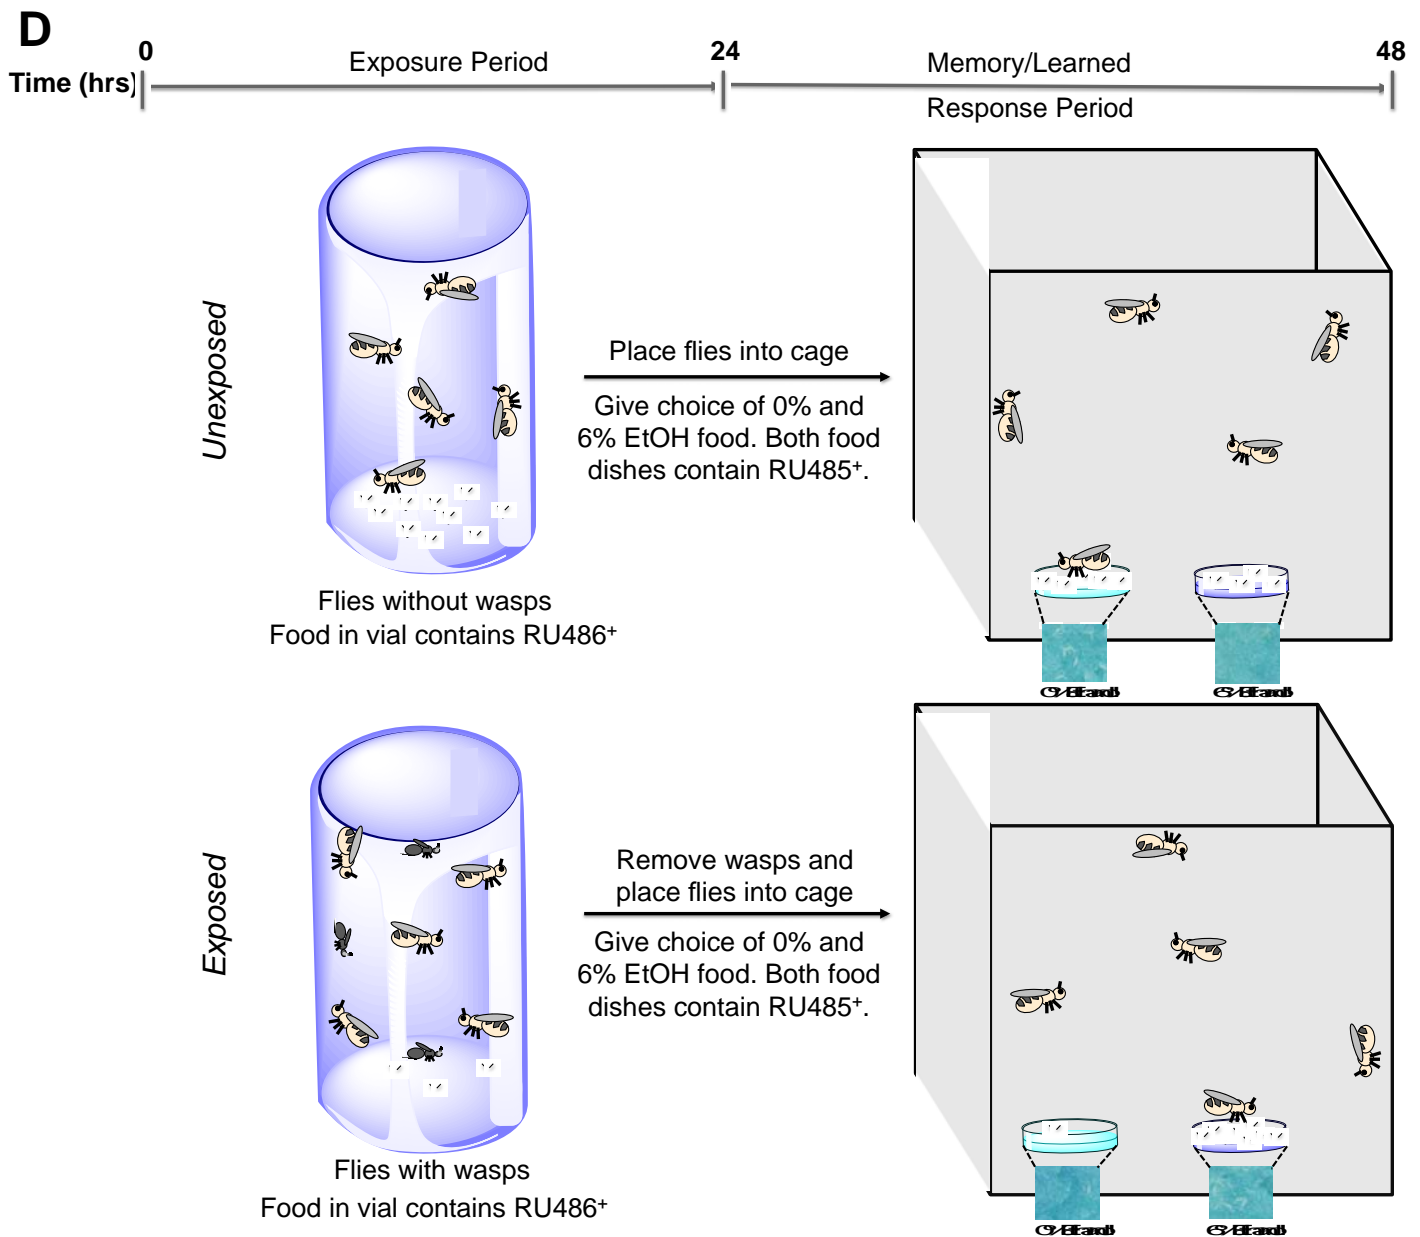

**Figure S2 Experimental design for MB Gene-Switch Experiments and control brains.** Brains from flies carrying transgenes for the Gene-Switch construct in the mushroom body along with a GFP nls showing (A) DAPI, (B) GFP expression, and (C) the merged image. Note that images in (A-C) illustrate a control brain in which RU486 was not included in the food. See Figure 5 (A-C) for comparison of GFP-labeled mushroom body after RU486 feeding. (D) Diagram of the standard oviposition preference memory setup when using RU486 feeding.
