# Supplementary material
Source: PubMed Central journal article supplement (PMC4391557)
Supplement: 113151cc98ec613d571c206137e67243_genetics.114.172221-3.pdf [file 113151cc98ec613d571c206137e67243_genetics.114.172221-3.pdf]

Table S 2

| <u>Corresponding figure</u> | <u>Comparison groups</u>                         | <u>Sample size</u> | <u>p-value</u> | <u>Statistical test</u> |
|-----------------------------|--------------------------------------------------|--------------------|----------------|-------------------------|
| S1A                         | Fmr1[3] (0-24) exposed vs unexposed              | 24                 | 1.93E-08       | t-test                  |
| S1B                         | Fmr1[B55] (0-24) exposed vs unexposed            | 24                 | 1.31E-15       | t-test                  |
| S1C                         | amn[X8] (0-24) exposed vs unexposed              | 24                 | 3.87E-14       | t-test                  |
| S1D                         | amn[1] (0-24) exposed vs unexposed               | 24                 | 1.78E-22       | t-test                  |
| S1E                         | rut[2080] (0-24) exposed vs unexposed            | 24                 | 4.61E-15       | t-test                  |
| S1F                         | dnc[mL] (0-24) exposed vs unexposed              | 24                 | 4.12E-16       | t-test                  |
| S3A                         | Adf1[naI] (0-24) constant exposure vs unexposed  | 10                 | 8.10E-12       | t-test                  |
| S3A                         | Adf1[naI] (24-48) constant exposure vs unexposed | 10                 | 2.23E-10       | t-test                  |
| S3B                         | rut[1] (0-24) constant exposure vs unexposed     | 10                 | 7.50E-12       | t-test                  |
| S3B                         | rut[1] (24-48) constant exposure vs unexposed    | 10                 | 6.79E-14       | t-test                  |
| S3C                         | rut[2080] (0-24) constant exposure vs unexposed  | 10                 | 4.68E-12       | t-test                  |
| S3C                         | rut[2080] (24-48) constant exposure vs unexposed | 10                 | 5.04E-11       | t-test                  |
| S3D                         | amn[X8] (0-24) constant exposure vs unexposed    | 10                 | 3.00E-12       | t-test                  |
| S3D                         | amn[X8] (24-48) constant exposure vs unexposed   | 10                 | 3.71E-11       | t-test                  |
| S3E                         | amn[1] (0-24) constant exposure vs unexposed     | 10                 | 4.74E-10       | t-test                  |
| S3E                         | amn[1] (24-48) constant exposure vs unexposed    | 10                 | 1.94E-11       | t-test                  |
| S3F                         | dnc[1] (0-24) constant exposure vs unexposed     | 10                 | 8.51E-10       | t-test                  |
| S3F                         | dnc[1] (24-48) constant exposure vs unexposed    | 10                 | 9.05E-13       | t-test                  |
| S3G                         | dnc[ML] (0-24) constant exposure vs unexposed    | 10                 | 4.26E-19       | t-test                  |
| S3G                         | dnc[ML] (24-48) constant exposure vs unexposed   | 10                 | 6.00E-20       | t-test                  |
| S3H                         | FMR1[3] (0-24) constant exposure vs unexposed    | 10                 | 1.71E-10       | t-test                  |
| S3H                         | FMR1[3] (24-48) constant exposure vs unexposed   | 10                 | 2.21E-11       | t-test                  |
| S3I                         | FMR1[B55] (0-24) constant exposure vs unexposed  | 10                 | 2.33E-12       | t-test                  |
| S3I                         | FMR1[B55] (24-48) constant exposure vs unexposed | 10                 | 8.49E-13       | t-test                  |
| S3J                         | Orb2[ΔQ] (0-24) constant exposure vs unexposed   | 10                 | 9.94E-15       | t-test                  |
| S3J                         | Orb2[ΔQ] (24-48) constant exposure vs unexposed  | 10                 | 4.53E-12       | t-test                  |
