# Supplementary material
Source: PubMed Central journal article supplement (PMC4391557)
Supplement: 569129d974517f9d0f83fc93aa33a4a6_genetics.114.172221-6.pdf [file 569129d974517f9d0f83fc93aa33a4a6_genetics.114.172221-6.pdf]

**Table S1 Statistical analyses for main figures.** Welch's two-tailed t-tests were performed for all egg count data. P-values reported were calculated for comparisons between paired treatment-group and unexposed.

| <u>Corresponding figure</u> | <u>Comparison groups</u>                                              | <u>Sample size</u> | <u>p-value</u> | <u>Statistical test</u> |
|-----------------------------|-----------------------------------------------------------------------|--------------------|----------------|-------------------------|
| 1B                          | CS (0-24) exposed vs unexposed                                        | 4                  | 1.34E-05       | t-test                  |
| 1B                          | CS (24-48) exposed vs unexposed                                       | 4                  | 1.15E-03       | t-test                  |
| 1B                          | OreR (0-24) exposed vs unexposed                                      | 4                  | 6.19E-04       | t-test                  |
| 1B                          | OreR (24-48) exposed vs unexposed                                     | 4                  | 3.21E-06       | t-test                  |
| 1B                          | w1118 (0-24) exposed vs unexposed                                     | 4                  | 1.93E-04       | t-test                  |
| 1B                          | w1118 (24-48) exposed vs unexposed                                    | 4                  | 2.42E-04       | t-test                  |
| 1C                          | CS (0-24) 2.5 hr exposed vs unexposed                                 | 4                  | 5.10E-01       | t-test                  |
| 1C                          | CS (24-48) 2.5 hr exposed vs unexposed                                | 4                  | 1.70E-01       | t-test                  |
| 1C                          | CS (0-24) 7 hr exposed vs unexposed                                   | 4                  | 6.65E-02       | t-test                  |
| 1C                          | CS (24-48) 7 hr exposed vs unexposed                                  | 4                  | 3.76E-01       | t-test                  |
| 1C                          | CS (0-24) 14 hr exposed vs unexposed                                  | 4                  | 5.35E-05       | t-test                  |
| 1C                          | CS (24-48) 14 hr exposed vs unexposed                                 | 4                  | 9.98E-04       | t-test                  |
| 1C                          | CS (0-24) 24 hr exposed vs unexposed                                  | 4                  | 1.34E-05       | t-test                  |
| 1C                          | CS (24-48) 24 hr exposed vs unexposed                                 | 4                  | 1.15E-03       | t-test                  |
| 2A                          | Adf1[ <i>nal</i> ] (0-24) exposed vs unexposed                        | 4                  | 5.65E-01       | t-test                  |
| 2A                          | Adf1 [ <i>nal</i> ] (24-48) exposed vs unexposed                      | 4                  | 9.93E-01       | t-test                  |
| 2B                          | rut[1] (0-24) exposed vs unexposed                                    | 4                  | 6.51E-01       | t-test                  |
| 2B                          | rut [1] (24-48) exposed vs unexposed                                  | 4                  | 5.30E-01       | t-test                  |
| 2C                          | rut[2080] (0-24) exposed vs unexposed                                 | 4                  | 7.95E-01       | t-test                  |
| 2C                          | rut[2080] (24-48) exposed vs unexposed                                | 4                  | 2.53E-01       | t-test                  |
| 2D                          | amn[X8] (0-24) exposed vs unexposed                                   | 4                  | 2.30E-01       | t-test                  |
| 2D                          | amn [X8] (24-48) exposed vs unexposed                                 | 4                  | 1.01E-01       | t-test                  |
| 2E                          | amn[1] (0-24) exposed vs unexposed                                    | 4                  | 2.24E-01       | t-test                  |
| 2E                          | amn[1] (24-48) exposed vs unexposed                                   | 4                  | 7.51E-01       | t-test                  |
| 2F                          | dnc[1] (0-24) exposed vs unexposed                                    | 4                  | 4.83E-01       | t-test                  |
| 2F                          | dnc[1] (24-48) exposed vs unexposed                                   | 4                  | 9.90E-01       | t-test                  |
| 2G                          | dnc[ML] (0-24) exposed vs unexposed                                   | 4                  | 3.93E-01       | t-test                  |
| 2G                          | dnc[ML] (24-48) exposed vs unexposed                                  | 4                  | 1.10E-01       | t-test                  |
| 2H                          | FMR1[3] (0-24) exposed vs unexposed                                   | 4                  | 3.22E-01       | t-test                  |
| 2H                          | FMR1[3] (24-48) exposed vs unexposed                                  | 4                  | 2.36E-01       | t-test                  |
| 2I                          | FMR1[B55] (0-24) exposed vs unexposed                                 | 4                  | 5.25E-01       | t-test                  |
| 2I                          | FMR1[B55] (24-48) exposed vs unexposed                                | 4                  | 3.24E-01       | t-test                  |
| 2J                          | Orb2[ΔQ] (0-24) exposed vs unexposed                                  | 4                  | 4.00E-01       | t-test                  |
| 2J                          | Orb2[ΔQ] (24-48) exposed vs unexposed                                 | 4                  | 6.14E-01       | t-test                  |
| 2K                          | Orb2[ΔQ] (0-24) constant exposure vs unexposed                        | 4                  | 6.84E-05       | t-test                  |
| 2K                          | Orb2[ΔQ] (24-48) constant exposure vs unexposed                       | 4                  | 3.91E-04       | t-test                  |
| 3A                          | TeTx (0-24) exposed vs unexposed                                      | 4                  | 7.18E-01       | t-test                  |
| 3A                          | TeTx (24-48) exposed vs unexposed                                     | 4                  | 6.78E-02       | t-test                  |
| 3B                          | TeTx (0-24) constant exposure vs unexposed                            | 4                  | 5.54E-03       | t-test                  |
| 3B                          | TeTx (24-48) constant exposure vs unexposed                           | 4                  | 6.75E-07       | t-test                  |
| 3C                          | OK107 GAL4 (0-24) exposed vs unexposed                                | 4                  | 6.67E-04       | t-test                  |
| 3C                          | OK107 GAL4 (24-48) exposed vs unexposed                               | 4                  | 8.10E-04       | t-test                  |
| 3D                          | UAS TeTx (0-24) exposed vs unexposed                                  | 4                  | 1.71E-04       | t-test                  |
| 3D                          | UAS TeTx (24-48) exposed vs unexposed                                 | 4                  | 1.99E-06       | t-test                  |
| 4A                          | Orb2 [RNAi] (0-24) exposed vs unexposed                               | 4                  | 3.48E-01       | t-test                  |
| 4A                          | Orb2 [RNAi] (24-48) exposed vs unexposed                              | 4                  | 7.25E-01       | t-test                  |
| 4C                          | Orb2 [RNAi] (0-24) constant exposure vs unexposed                     | 4                  | 9.21E-04       | t-test                  |
| 4C                          | Orb2 [RNAi] (24-48) constant exposure vs unexposed                    | 4                  | 1.96E-04       | t-test                  |
| 4D                          | UAS Orb2 [RNAi] (0-24) exposed vs unexposed                           | 4                  | 1.52E-04       | t-test                  |
| 4D                          | UAS Orb2 [RNAi] (24-48) exposed vs unexposed                          | 4                  | 6.06E-05       | t-test                  |
| 5E                          | MB switch ; Orb2 [RNAi] RU486+ (0-24) exposed vs unexposed            | 4                  | 4.59E-01       | t-test                  |
| 5E                          | MB switch ; Orb2 [RNAi] RU486+ (24-48) exposed vs unexposed           | 4                  | 7.22E-01       | t-test                  |
| 5F                          | MB switch ; Orb2 [RNAi] RU486- (0-24) exposed vs unexposed            | 4                  | 3.14E-03       | t-test                  |
| 5F                          | MB switch ; Orb2 [RNAi] RU486 (24-48) exposed vs unexposed            | 4                  | 6.33E-03       | t-test                  |
| 5G                          | MB switch ; Orb2 [RNAi] RU486+ (0-24) constant exposure vs unexposed  | 4                  | 4.73E-07       | t-test                  |
| 5G                          | MB switch ; Orb2 [RNAi] RU486+ (24-48) constant exposure vs unexposed | 4                  | 1.34E-04       | t-test                  |
| 5H                          | MB switch RU486+ (0-24) exposed vs unexposed                          | 4                  | 5.57E-06       | t-test                  |
| 5H                          | MB switch RU486+ (24-48) exposed vs unexposed                         | 4                  | 3.63E-04       | t-test                  |
| 5I                          | MB switch RU486- (0-24) exposed vs unexposed                          | 4                  | 9.91E-04       | t-test                  |
| 5I                          | MB switch RU486- (24-48) exposed vs unexposed                         | 4                  | 1.27E-03       | t-test                  |
| 6C                          | Single CS (0-24) exposed vs unexposed                                 | 10                 | 6.31E-08       | t-test                  |
| 6C                          | Single CS (24-48) exposed vs unexposed                                | 10                 | 5.83E-07       | t-test                  |
| 6D                          | Five CS (0-24) exposed vs unexposed                                   | 10                 | 7.85E-07       | t-test                  |
| 6D                          | Five CS (24-48) exposed vs unexposed                                  | 10                 | 1.67E-06       | t-test                  |
| 6E                          | Canton-S (0-24) constant exposure vs unexposed                        | 10                 | 7.04E-13       | t-test                  |
| 6E                          | Canton-S (24-48) constant exposure vs unexposed                       | 10                 | 1.80E-13       | t-test                  |
