# Supplementary material
Source: PubMed Central journal article supplement (PMC4391557)
Supplement: 60925487c4227f4d4210ecd707e47819_genetics.114.172221-2.pdf [file 60925487c4227f4d4210ecd707e47819_genetics.114.172221-2.pdf]

Figure S4

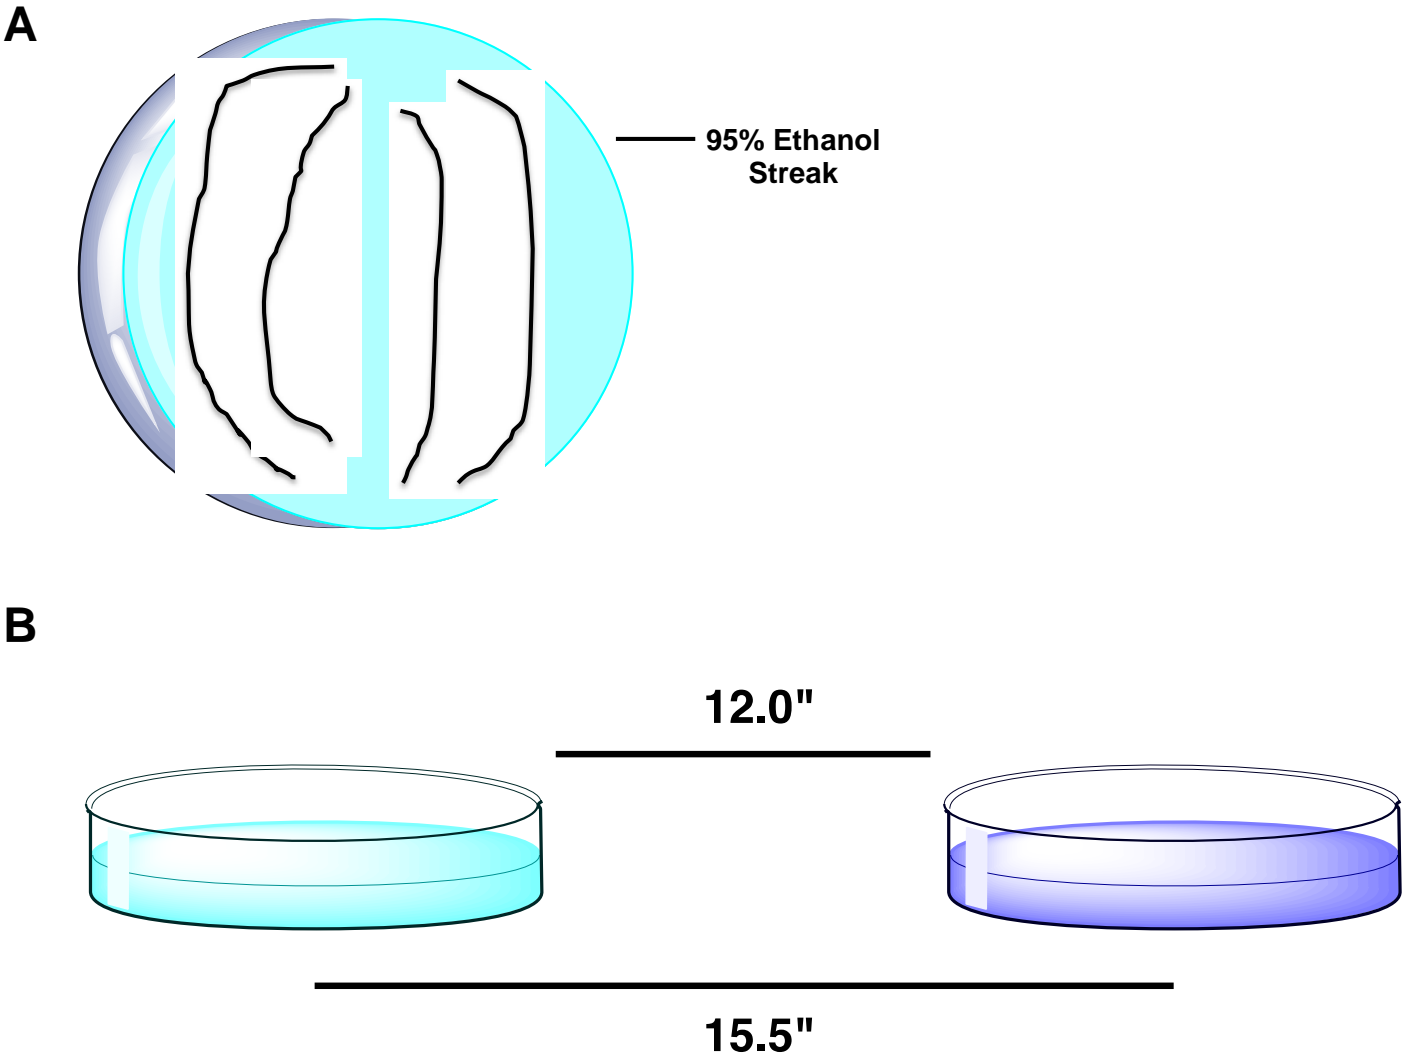

**Figure S4** Field cage preparation and measurements. (A) Sample Petri dish demonstrating how to streak 95% ethanol over instant food already hydrated with ddH<sub>2</sub>O. (B) Two Petri dishes positioned as if they are in the field cage, showing distance between plates.
