# Supplementary material
Source: PubMed Central journal article supplement (PMC4391557)
Supplement: b9d5db28defe7d22245f6ed37a94c93b_genetics.114.172221-4.pdf [file b9d5db28defe7d22245f6ed37a94c93b_genetics.114.172221-4.pdf]

Figure S3

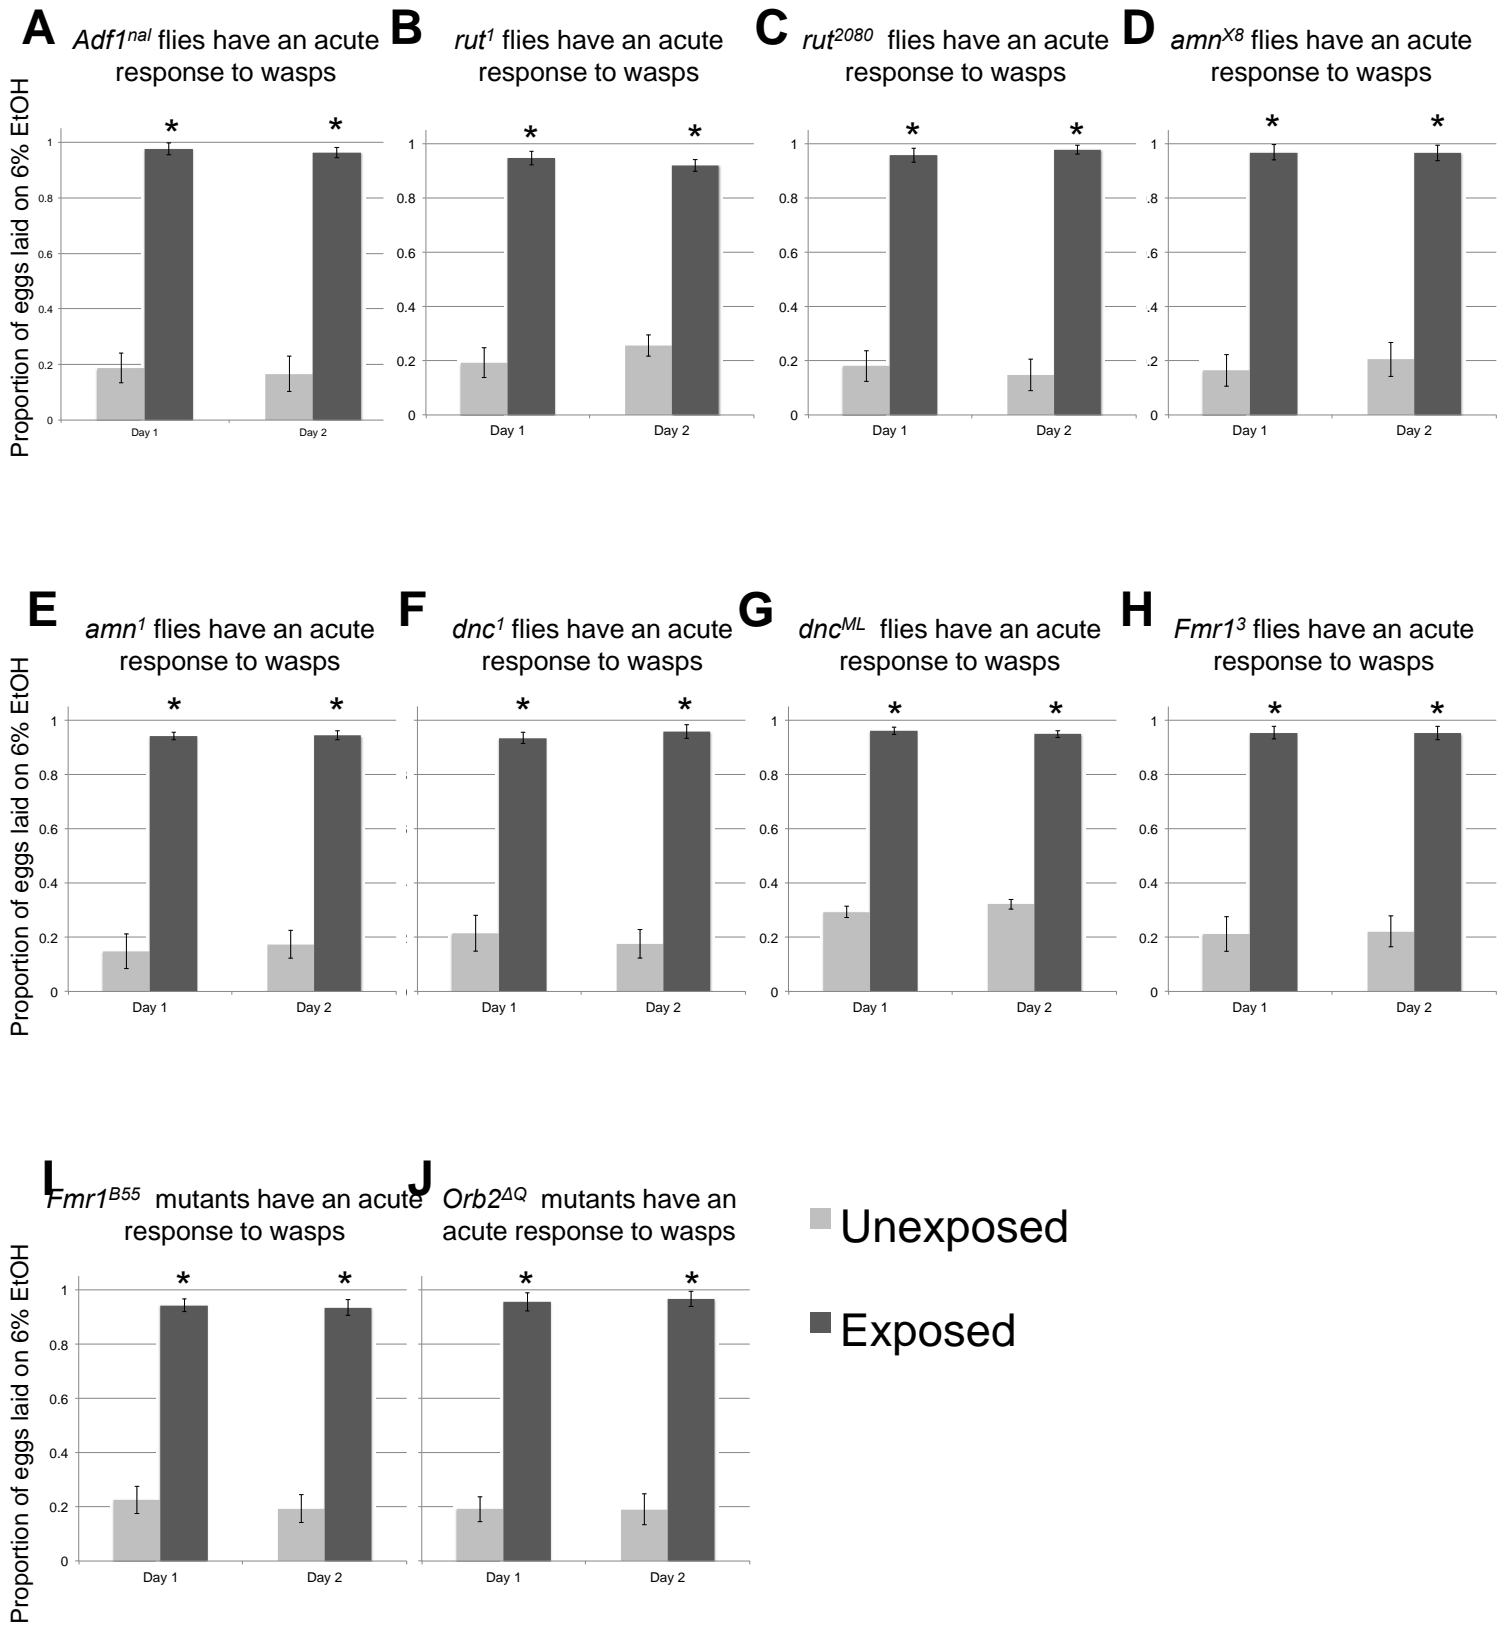

**Figure S3 Further evidence demonstrating the role of LTM in the fly-wasp memory paradigm.** Proportion of eggs laid on the 6% ethanol oviposition dish during constant wasp exposure for (A) *Adf1<sup>nal</sup>*, (B) *rut<sup>1</sup>*, (C) *rut<sup>2080</sup>*, (D) *amn<sup>X8</sup>*, (E) *amn<sup>X1</sup>*, (F) *dnc<sup>1</sup>*, (G) *dnc<sup>ML</sup>*, (H) *Fmr1<sup>3</sup>*, (I) *Fmr1<sup>B55</sup>*, and (J) *Orb2<sup>ΔQ</sup>*. Error bars represent 95% confidence intervals. (*n*= 10 biological replicates) (\* *P* < 0.001). Diagram of the oviposition preference setup using five flies with constant exposure to wasps in Figure 6B.
