# Supplementary material
Source: PubMed Central journal article supplement (PMC4391557)
Supplement: df26df655b0f20acc3e5fae2b873f3ff_genetics.114.172221-9.pdf [file df26df655b0f20acc3e5fae2b873f3ff_genetics.114.172221-9.pdf]

**Table S3 Fly genotypes used in this study.**

| Gene/Allele Name                | Genotype                                                                           | Acquisition Location        | ID #   |
|---------------------------------|------------------------------------------------------------------------------------|-----------------------------|--------|
| <i>dnc</i> <sup>1</sup>         | <i>dnc</i> [1]                                                                     | Griffith Lab                | 6020   |
| <i>rut</i> <sup>1</sup>         | <i>rut</i> [1]                                                                     | Griffith Lab                | 9404   |
| <i>Orb2</i> <sup>ΔQ</sup>       | <i>Orb2</i> <sup>ΔQ</sup>                                                          | <i>Keleman et al., 2007</i> | N/A    |
| <i>Adf1</i> <sup>nal</sup>      | <i>Adf1</i> <sup>nal</sup>                                                         | <i>DeZazzo et al., 2000</i> | N/A    |
| <i>UAS-TeTx</i>                 | <i>wg</i> <sup>1</sup> <i>w</i> [*]; P{w[+mC]=UAS-TeTxLC.tnt}G2                    | Bloomington Stock Center    | 28838  |
| <i>OK-107</i>                   | <i>w</i> [*];<br>P{w[+mW.hs]=GawB}ey[OK107]/In(4)ci[D], ci[D] pan[ciD] sv[spa-pol] | Bloomington Stock Center    | 854    |
| <i>amn</i> <sup>1</sup>         | <i>amn</i> [1]                                                                     | Griffith Lab                | 5954   |
| <i>dnc</i> <sup>ML</sup>        | <i>y</i> [1] <i>w</i> [1] <i>dnc</i> [ML] <i>f</i> [36a]/FM7a                      | Griffith Lab                | 9407   |
| <i>rut</i> <sup>2080</sup>      | P{ry[+t7.2]=lArB}rut[2080]; P{w[+mC]=UAS-rut.Z}2                                   | Griffith Lab                | 9405   |
| <i>amn</i> <sup>X8</sup>        | <i>amn</i> [X8]                                                                    | Griffith Lab                | N/A    |
| <i>FMR1</i> <sup>3</sup>        | <i>Fmr1</i> [3]                                                                    | -                           | N/A    |
| <i>FMR1</i> <sup>B55</sup>      | <i>w</i> [*]; <i>Fmr1</i> [B55]                                                    | Bloomington Stock Center    | 109026 |
| <i>UAS-Orb2</i> <sup>RNAi</sup> | <i>y</i> [1] <i>v</i> [1]; P{y[+t7.7]v[+t1.8]=TRiP.JF02376}attP2                   | Bloomington Stock Center    | 27050  |
| <i>MB Gene-Switch</i>           | P{MB-Switch}                                                                       | Greg Roman                  | N/A    |
