# Supplementary material
Source: PubMed Central journal article supplement (PMC4391557)
Supplement: f3c2af1263b75c3e568965e7c7c43809_genetics.114.172221-7.pdf [file f3c2af1263b75c3e568965e7c7c43809_genetics.114.172221-7.pdf]

Figure S5

**A**

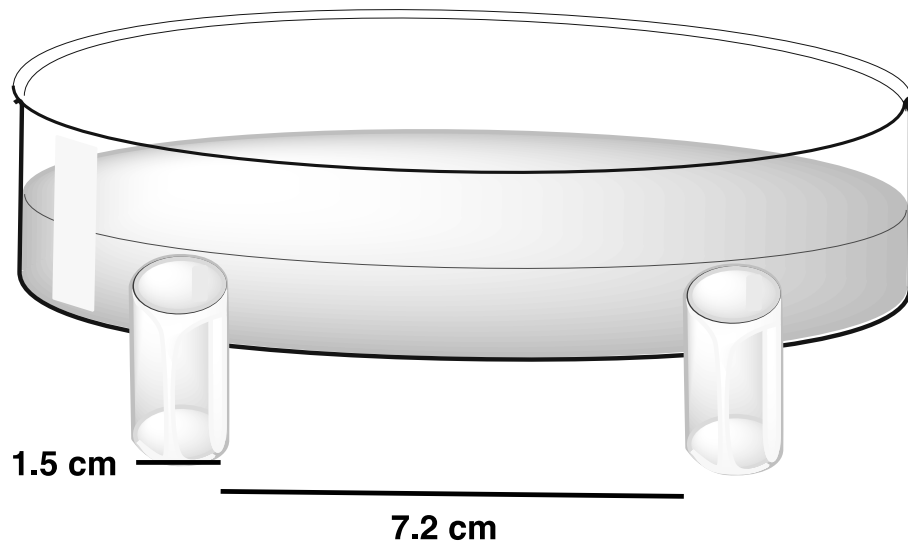

**B**

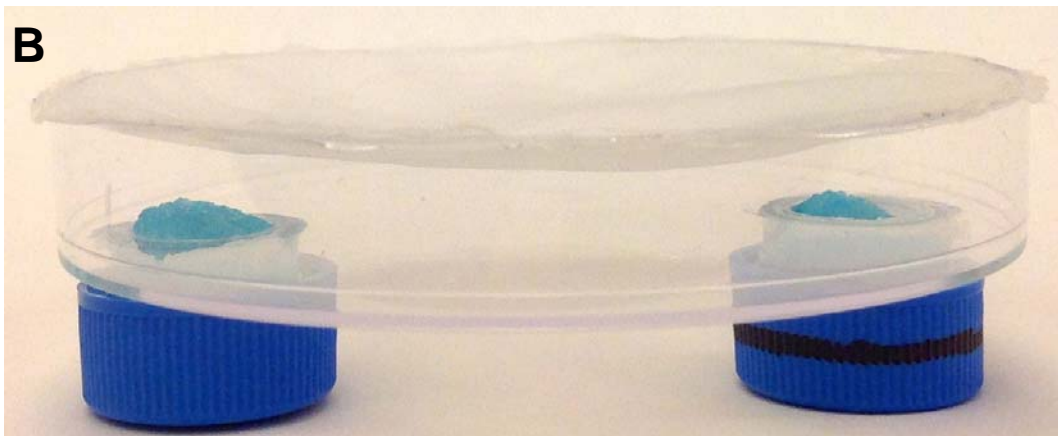

**C**

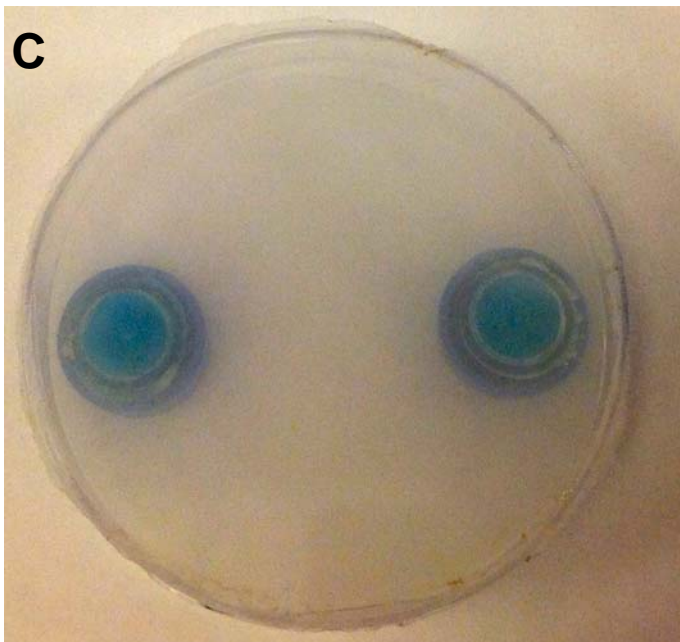

**Figure S5 Fly Corral preparation and measurements.** (A) Sample Fly Corral cage showing distances between caps and diameter of caps. (B) Lateral view of Fly Corral. (C) Dorsal view of Fly Corral.
